# Supplementary material
Source: Royal Society of Chemistry journal article supplement (doi:10.1039/d6cp00611f)
Supplement: d6cp00611f1.pdf [file d6cp00611f1.pdf]

# Thermodynamic Selectivity and Kinetic Control in the Encapsulation of Spiropyran Derivatives by Cucurbit[8]uril

Yinghui Niu,<sup>†,‡</sup> Fengbiao Chen,<sup>†,‡</sup> Xinru Guo,<sup>†</sup> Yinjun Chen,<sup>\*,†</sup> Jin Wen,<sup>\*,†</sup> and  
Meifang Zhu<sup>†</sup>

<sup>†</sup>*State Key Laboratory of Advanced Fiber Materials, College of Materials Science and  
Engineering, Donghua University, Shanghai 201620, China*

<sup>‡</sup>*These authors contributed equally.*

E-mail: yj.chen@dhu.edu.cn; jinwen@dhu.edu.cn

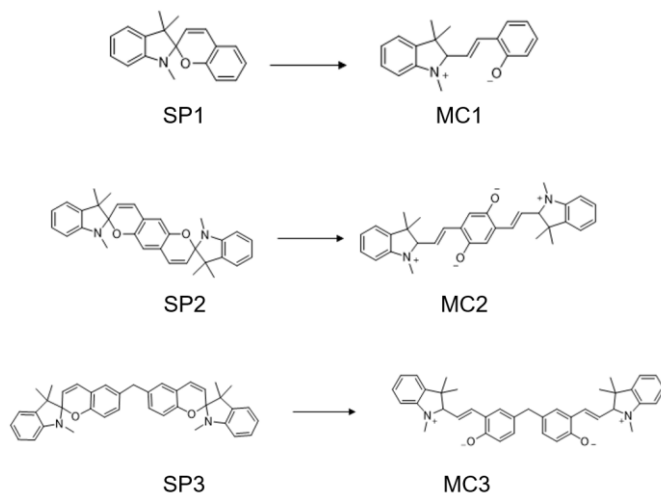

Figure S1. The molecular structural formulas of SP1-3 and MC1-3.

HR-ESI-MS (positive mode,  $m/z$ ): a dominant peak at 665.2456 was observed, corresponding to the doubly protonated molecular ion  $[M+2H]^{2+}$  of CB[8].

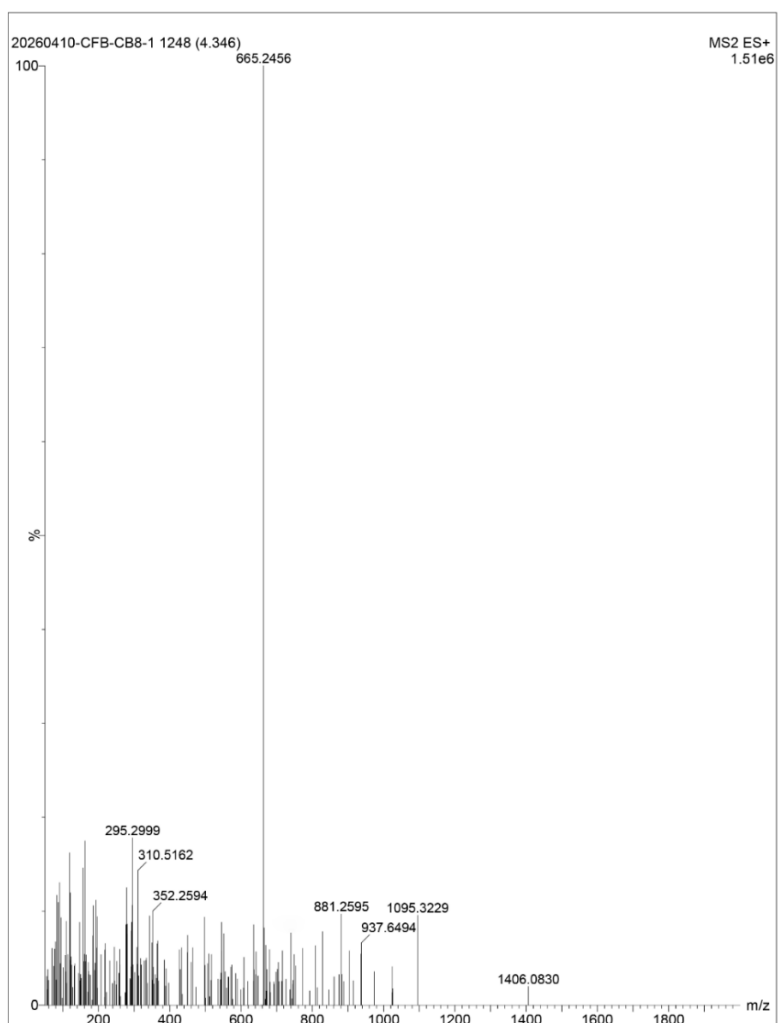

Figure S2. MS spectra of compound CB[8].

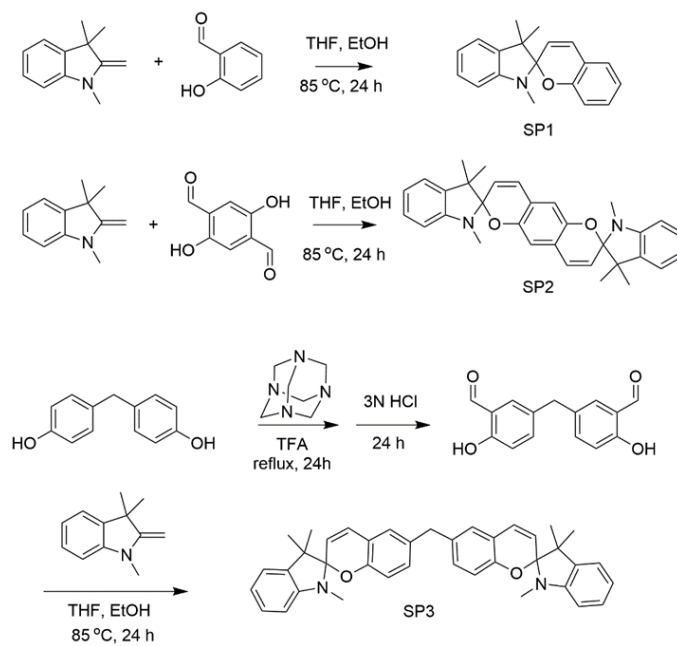

Figure S3. Synthesis route of spiropyran derivatives SP1-3.

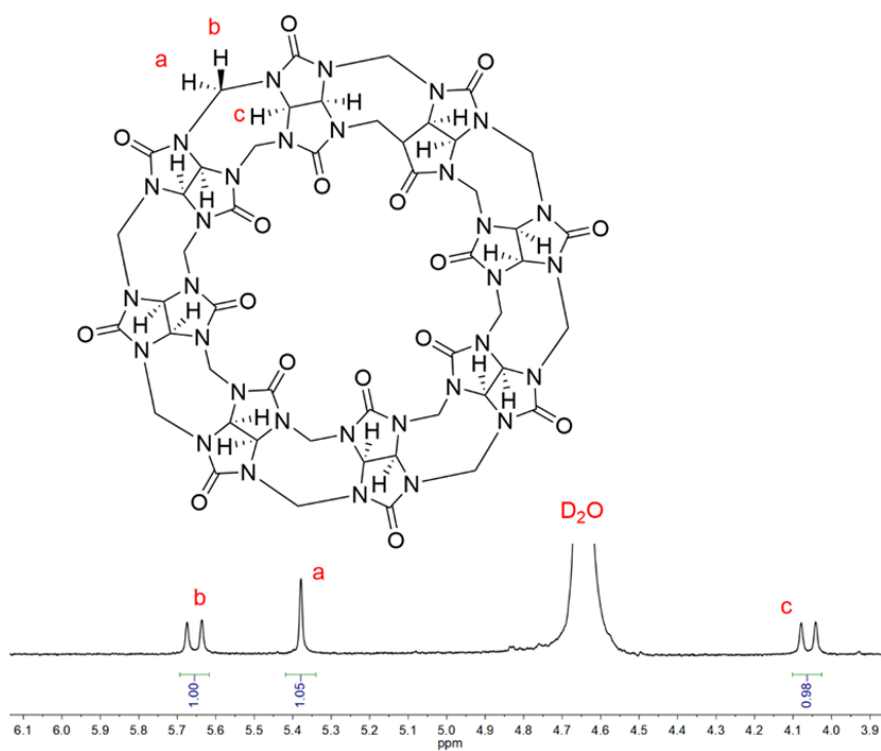

Figure S4. <sup>1</sup>H NMR spectrum of CB[8].

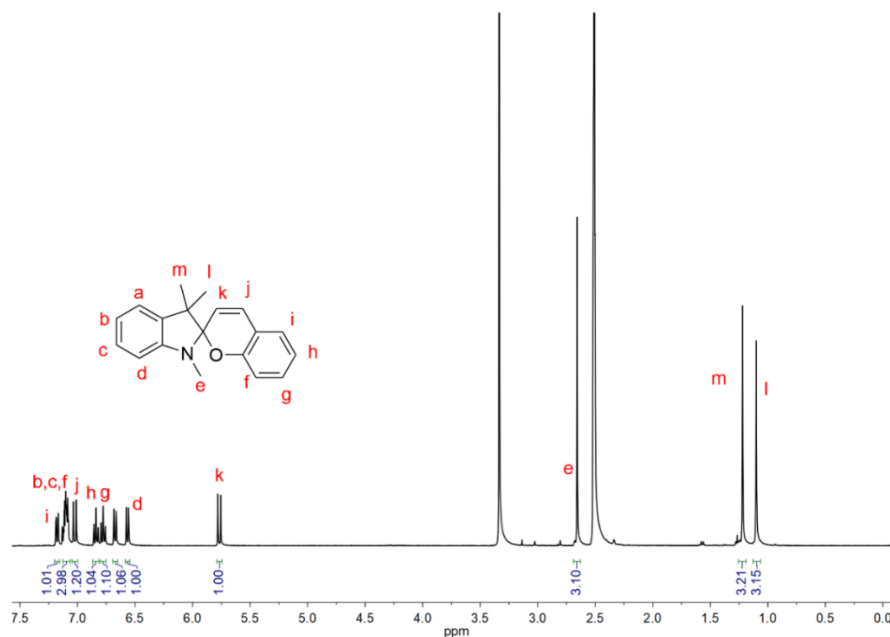

Figure S5.  $^1\text{H}$  NMR spectrum of SP1.  $^1\text{H}$  NMR (400 MHz,  $\text{DMSO-d}_6$ )  $\delta$  7.18 (dd, = 7.5, 1.7 Hz, 1H), 7.10 (ddt,  $J = 7.4, 3.5, 1.6$  Hz, 3H), 7.02 (d,  $J = 10.1$  Hz, 1H), 6.84 (td,  $J = 7.4, 1.1$  Hz, 1H), 6.78 (td,  $J = 7.4, 1.0$  Hz, 1H), 6.67 (d,  $J = 8.1$  Hz, 1H), 6.57 (d,  $J = 7.7$  Hz, 1H), 5.77 (d,  $J = 10.2$  Hz, 1H), 2.66 (s, 3H), 1.22 (s, 3H), 1.10 (s, 3H).

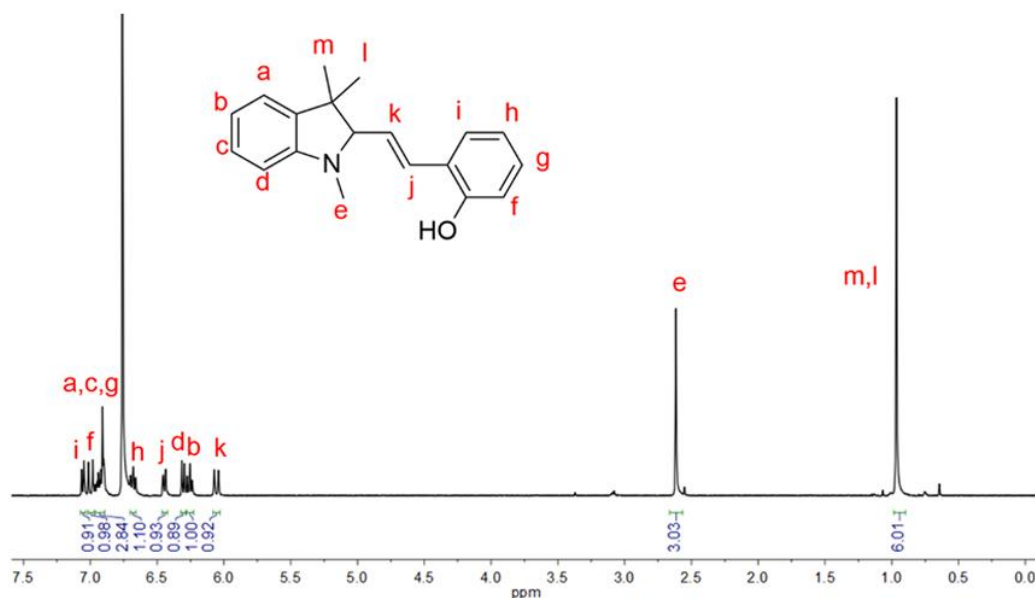

Figure S6.  $^1\text{H}$  NMR spectrum of MC1.  $^1\text{H}$  NMR (400 MHz, Deuterium Oxide)  $\delta$  7.07, 7.03 (m, 1H), 7.00 (d,  $J = 12.7$  Hz, 1H), 6.96–6.89 (m, 3H), 6.68 (t,  $J = 6.9$  Hz, 1H), 6.46–6.42 (m, 1H), 6.30 (d,  $J = 8.1$  Hz, 1H), 6.25 (t,  $J = 7.5$  Hz, 1H), 6.06 (d,  $J = 12.7$  Hz, 1H), 2.62 (s, 3H), 0.97 (s, 6H).

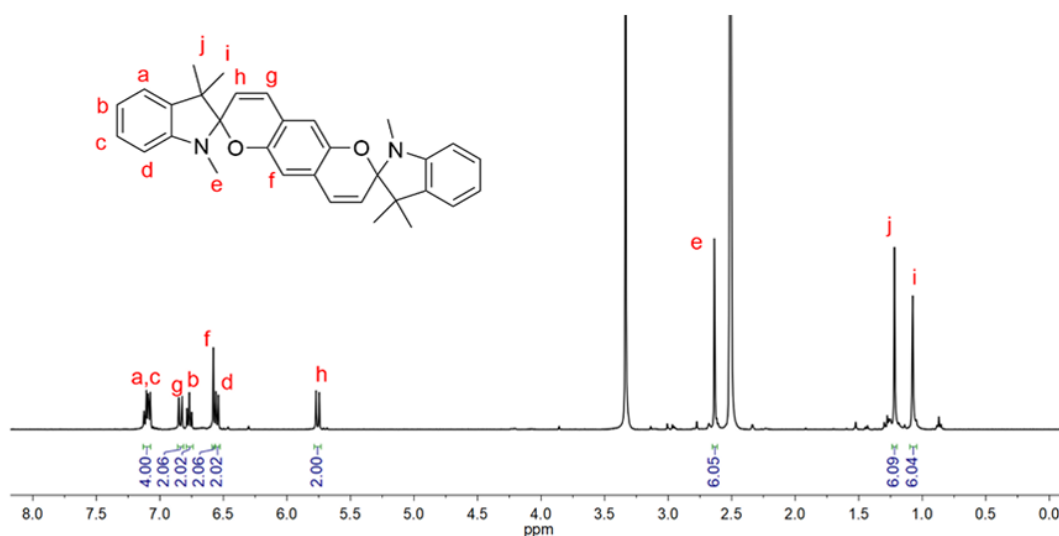

Figure S7.  $^1\text{H}$  NMR spectrum of SP2.  $^1\text{H}$  NMR (400 MHz,  $\text{DMSO-d}_6$ )  $\delta$  7.10 (td,  $J = 7.4, 5.5$  Hz, 4H), 6.84 (d,  $J = 10.1$  Hz, 2H), 6.77 (t,  $J = 7.4$  Hz, 2H), 6.58 (s, 2H), 6.55 (d,  $J = 7.7$  Hz, 2H), 5.76 (d,  $J = 10.2$  Hz, 2H), 2.64 (d,  $J = 1.4$  Hz, 6H), 1.22 (s, 6H), 1.08 (s, 6H).

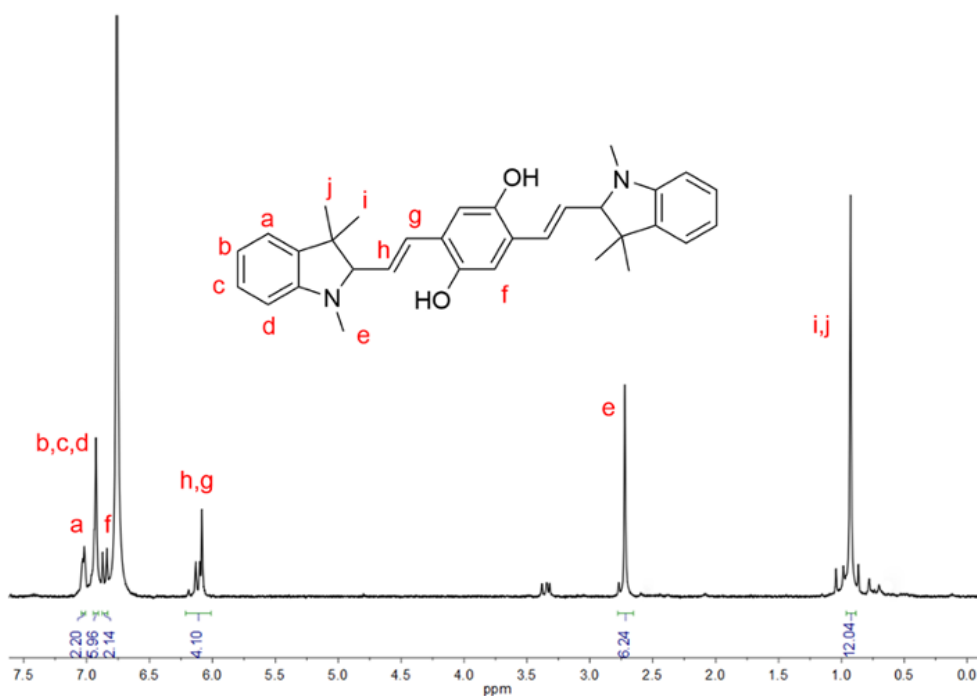

Figure S8.  $^1\text{H}$  NMR spectrum of MC2.  $^1\text{H}$  NMR (400 MHz, Deuterium Oxide)  $\delta$  7.03 (d,  $J = 5.8$  Hz, 2H), 6.93 (m,  $J = 4.7$  Hz, 6H), 6.86 (d,  $J = 12.8$  Hz, 2H), 6.21–6.01 (m, 4H), 2.72 (s, 6H), 0.93 (s, 12H).

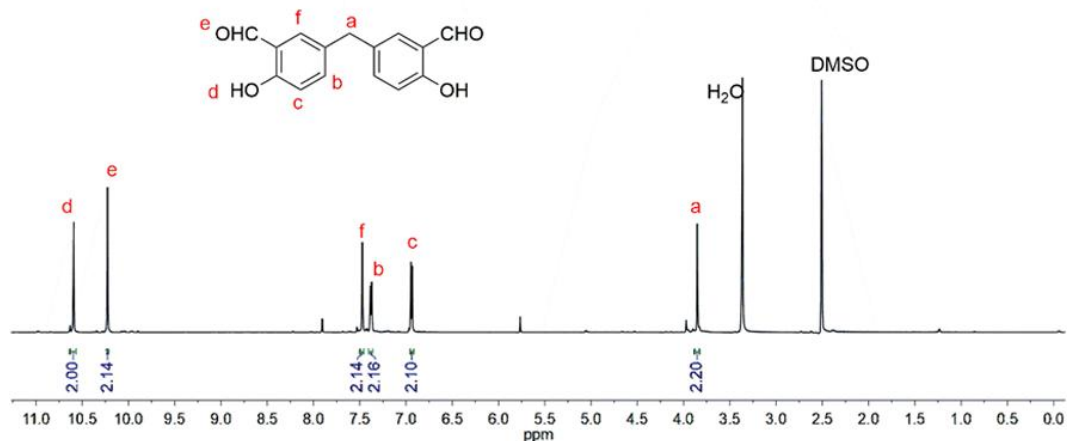

Figure S9. <sup>1</sup>H NMR spectrum of 5,5'-Methylenebis(2-hydroxybenzaldehyde). <sup>1</sup>H NMR (400 MHz, Chloroform-d)  $\delta$  10.85 (s, 1H), 9.77 (s, 1H), 7.30–7.24 (m, 2H), 6.88 (d,  $J$  = 8.4 Hz, 1H), 3.89 (s, 1H).

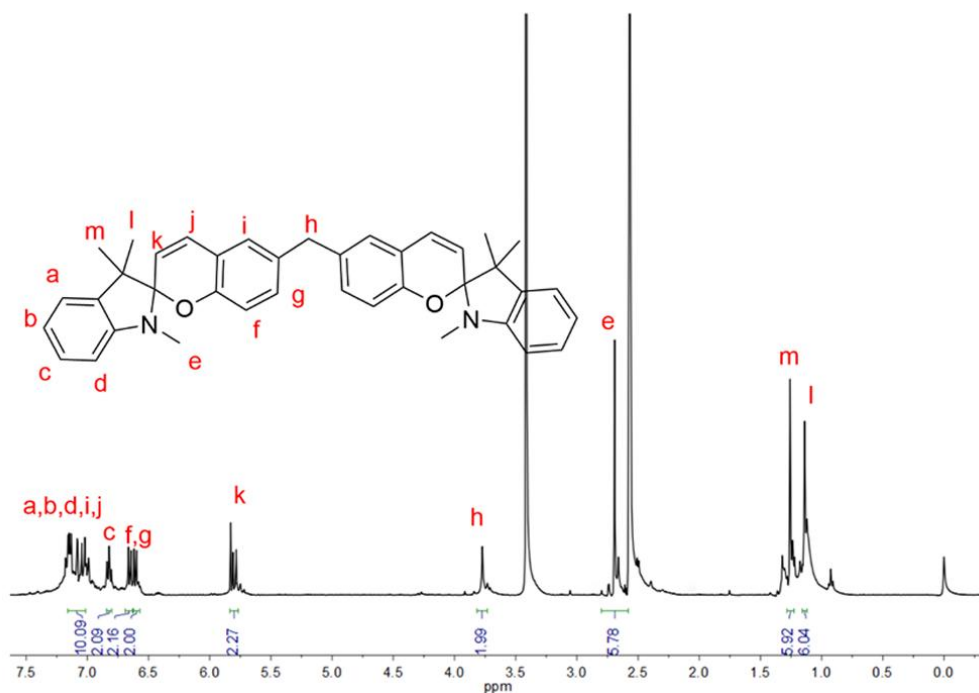

Figure S10. <sup>1</sup>H NMR spectrum of SP3. <sup>1</sup>H NMR (400 MHz, DMSO-d<sub>6</sub>)  $\delta$  7.23–7.01 (m, 10H), 6.84–6.80 (t, 2H), 6.65 (d,  $J$  = 8.4 Hz, 2H), 6.61 (d,  $J$  = 7.7 Hz, 2H), 5.83–5.77 (m, 2H), 3.77 (s, 2H), 2.68 (s, 6H), 1.26 (s, 6H), 1.14 (s, 6H).

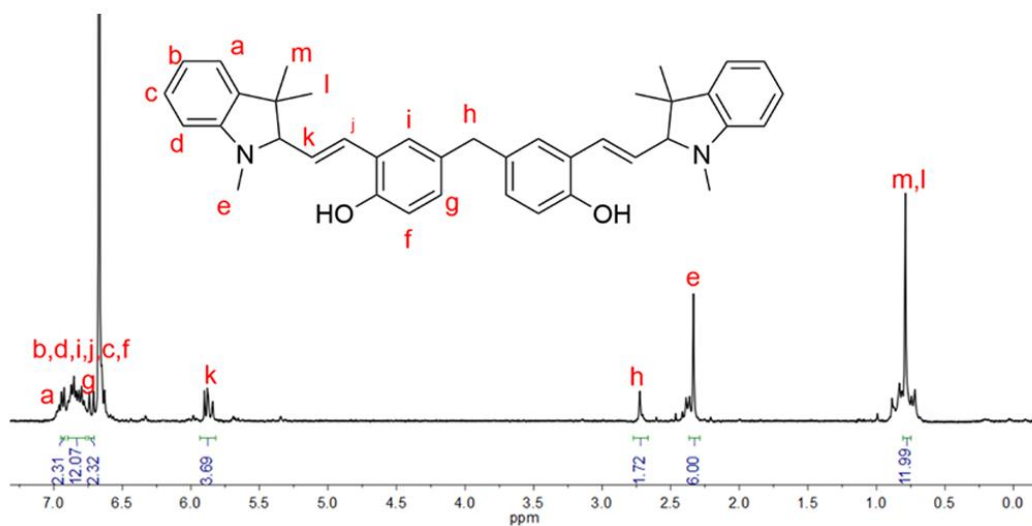

Figure S11. <sup>1</sup>H NMR spectrum of MC3. <sup>1</sup>H NMR (400 MHz, Deuterium Oxide)  $\delta$  6.93 (d,  $J=7.3$  Hz, 2H), 6.99–6.77 (m, 12H), 6.73 (d,  $J=12.3$  Hz, 2H), 5.93–5.82 (d, 2H), 2.73 (s, 2H), 2.35 (s, 6H), 0.79 (s, 12H).

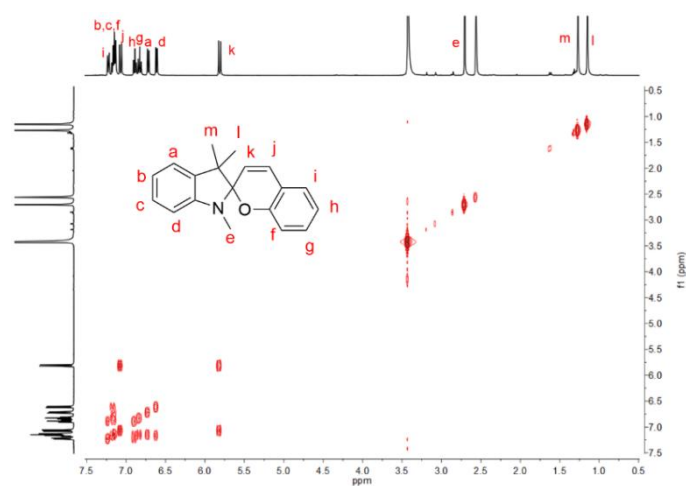

Figure S12. 2D <sup>1</sup>H-<sup>1</sup>H COSY (400 MHz, DMSO- $d_6$ ) of SP1.

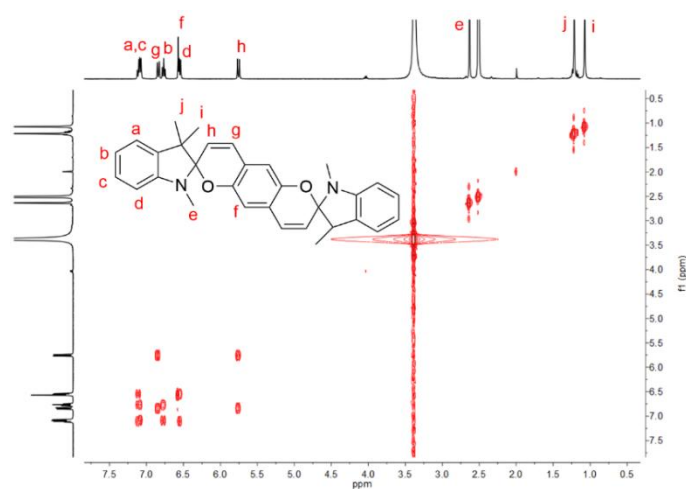

Figure S13. 2D <sup>1</sup>H-<sup>1</sup>H COSY (400 MHz, DMSO- $d_6$ ) of SP2.

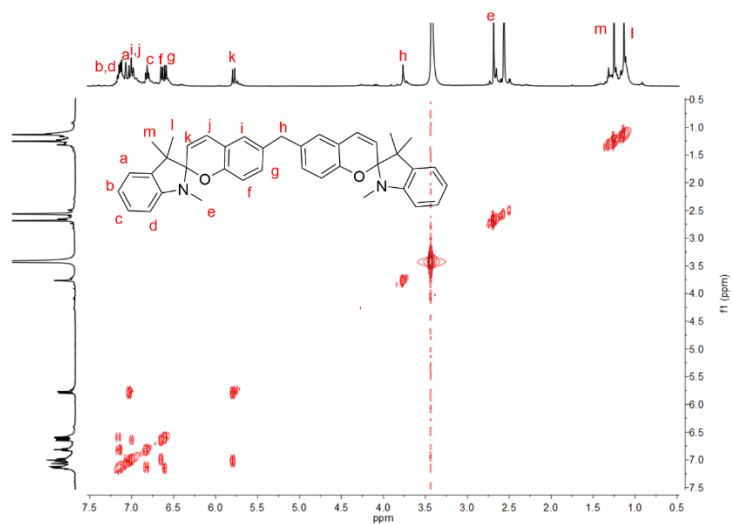

Figure S14. 2D  $^1\text{H}$ - $^1\text{H}$  COSY (400 MHz,  $\text{DMSO-d}_6$ ) of SP3.

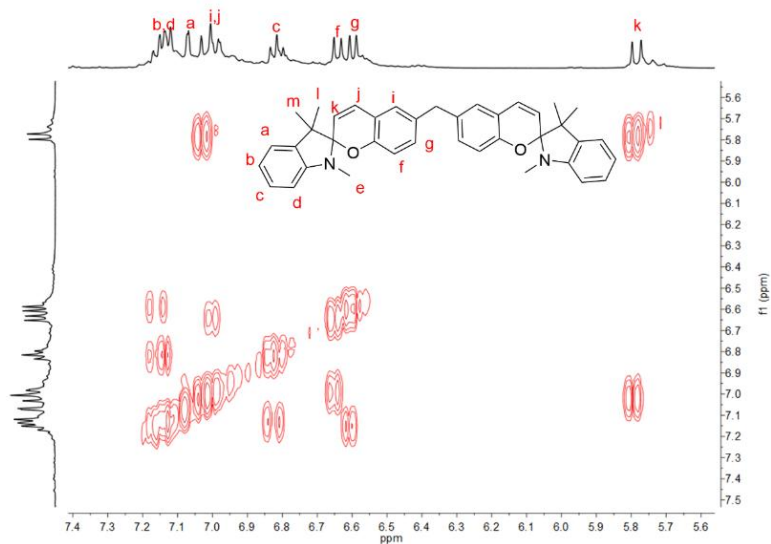

Figure S15. Two-dimensional COSY proton hydrogen assignment at the SP3 benzene ring position.

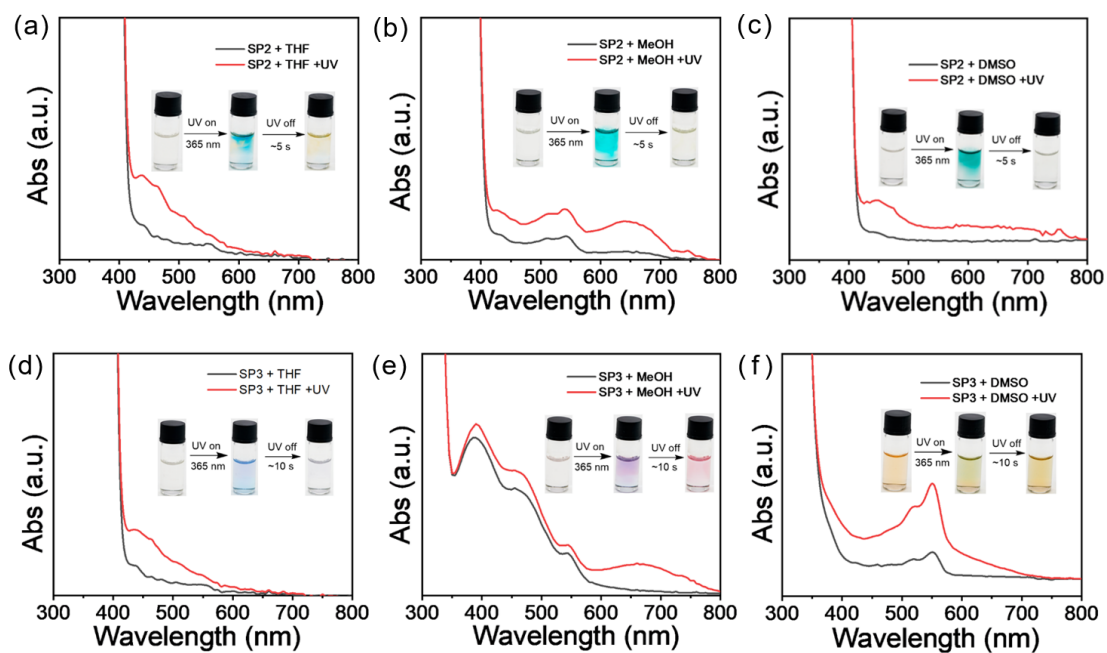

Figure S16. Photographs showing the color change and fade-back of SP2 and SP3 under 365 nm irradiation in THF, MeOH, and DMSO, and the corresponding UV-Vis absorption spectral changes. (a) SP2/THF; (b) SP2/MeOH; (c) SP2/DMSO; (d) SP3/THF; (e) SP3/MeOH; (f) SP3/DMSO.

Table S1. Key spectral positions and dipole moments for SP/MC species, together with the single-point energies of the corresponding guest@CB[8] complexes.

| Guest          | SP1      | MC1      | SP2      | MC2      | SP3      | MC3      |
|----------------|----------|----------|----------|----------|----------|----------|
| $\lambda$ (nm) | 350.0    | 455.0    | 389.5    | 521.3    | 349.2    | 452.4    |
| $\mu$ (D)      | 1.46     | 5.66     | 0.001    | 0.36     | 1.98     | 7.70     |
| $E$ (hartree)  | -5678.67 | -5678.64 | -6311.76 | -6311.65 | -6582.08 | -6582.03 |

Notes:  $\lambda$  denotes the absorption maximum, and  $\mu$  is the dipole moment in Debye (D).

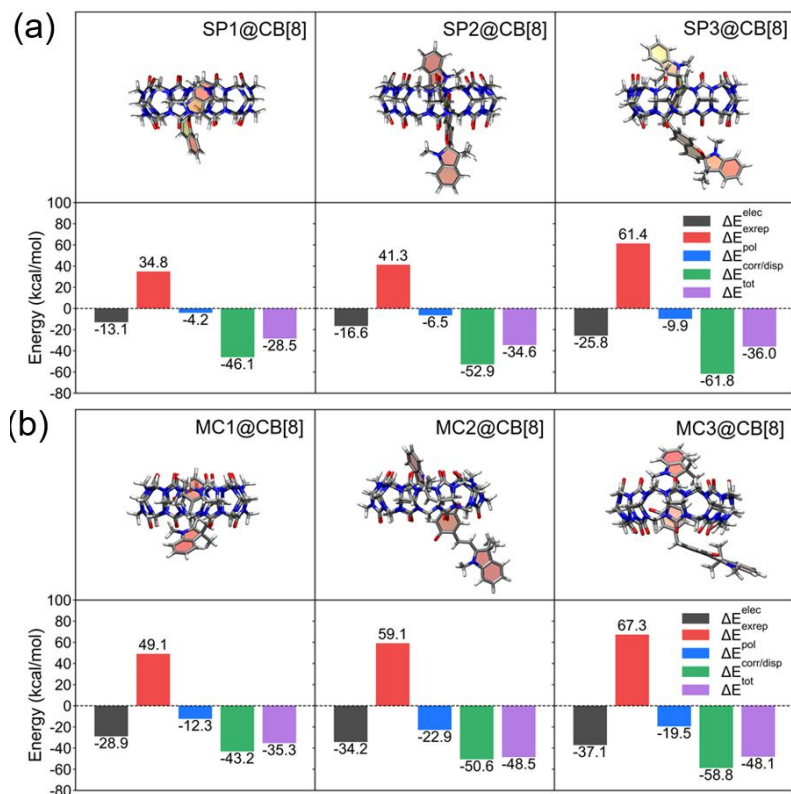

Figure S17. DFT-optimized geometries and GKS-EDA binding energy analyses of the host-guest inclusion complexes formed by CB[8] with (a) spiropyran isomers (SP1-3) and (b) merocyanine isomers (MC1-3). All calculations were performed at the  $\omega$ B97X-D3/cc-pVDZ level.

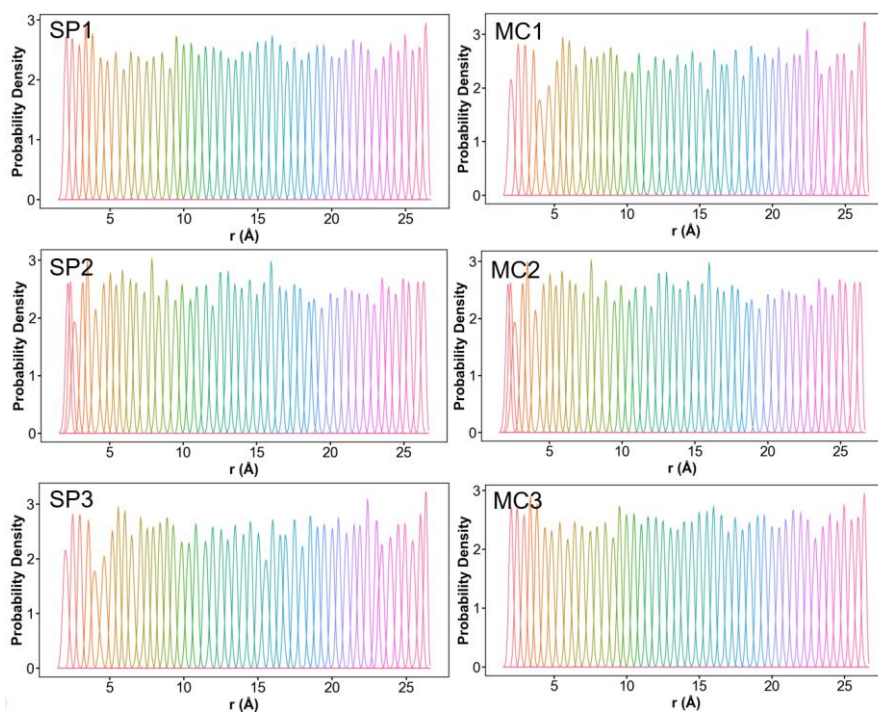

Figure S18. Probability density distributions of US windows for SP/MC@CB[8].

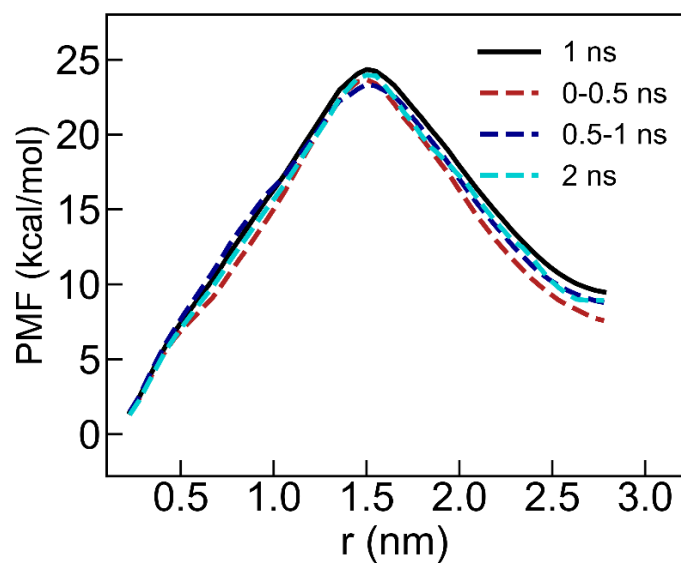

Figure S19. PMF convergence test for the SP1@CB[8] system. The PMF profiles were reconstructed from the original 1 ns trajectories of each umbrella window, the first 0-0.5 ns and second 0.5-1.0 ns segments, and the extended 2 ns sampling trajectories.

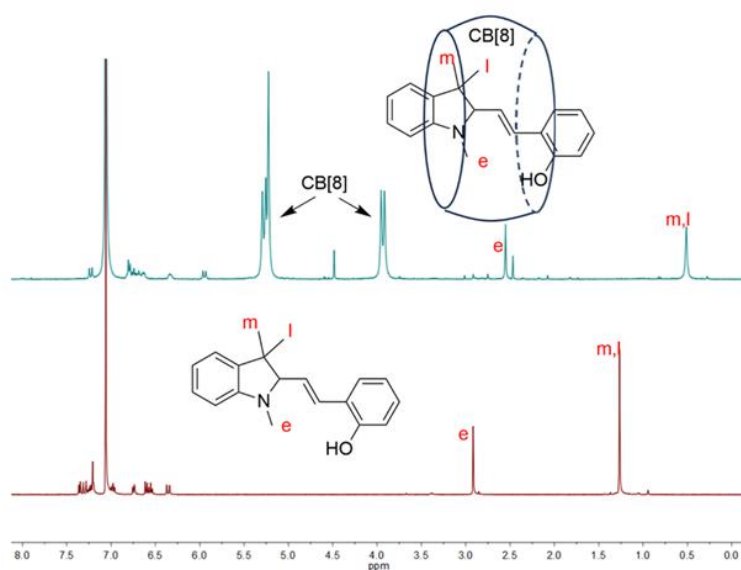

Figure S20. Comparison of NMR spectra of MC1 in 20% deuterium chloride in deuterium oxide solution before and after the addition of CB[8].

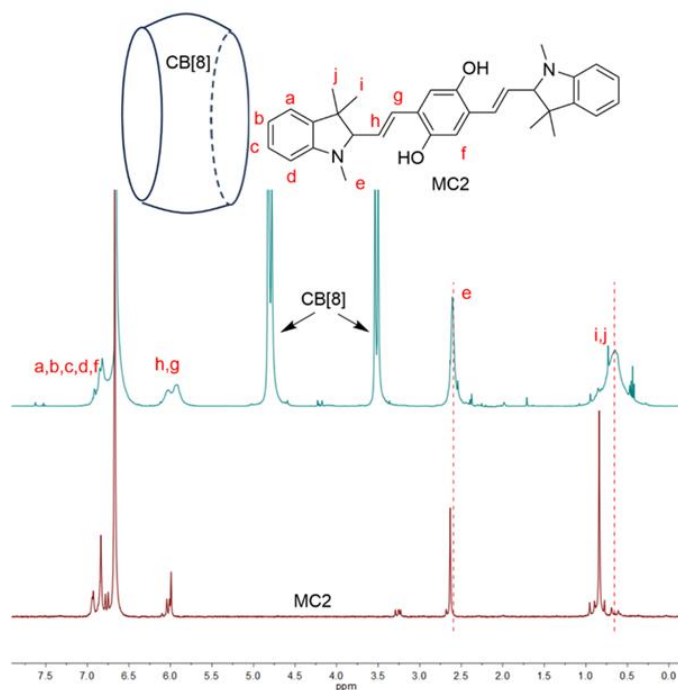

Figure S21. Comparison of NMR spectra of MC2 in 20% deuterium chloride in deuterium oxide solution before and after the addition of CB[8].

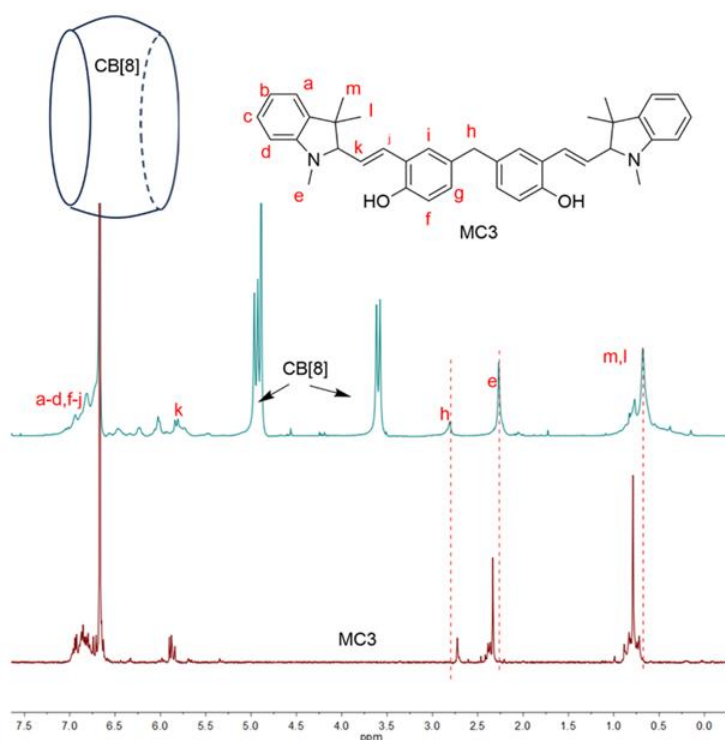

Figure S22. Comparison of NMR spectra of MC3 in 20% deuterium chloride in deuterium oxide solution before and after the addition of CB[8].

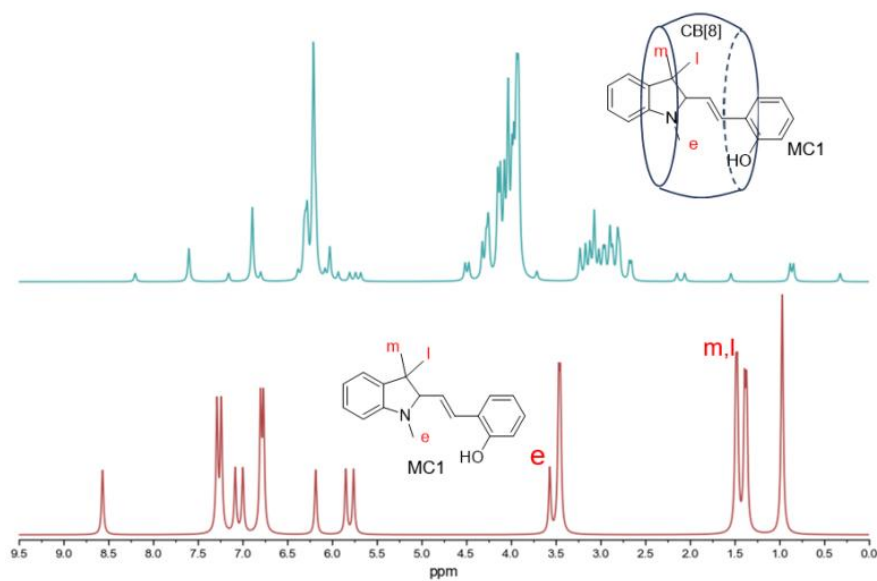

Figure S23. Comparison of simulated NMR spectra of MC1 before and after complexation with CB[8], calculated at the  $\omega$ B97X-D3/cc-pVDZ level in the gas phase using TMS as the chemical shift reference.

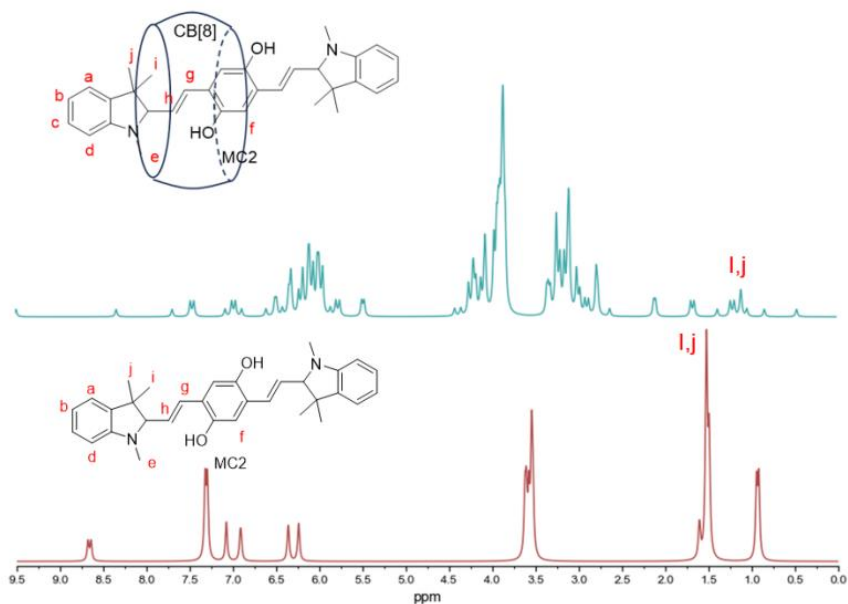

Figure S24. Comparison of simulated NMR spectra of MC2 before and after complexation with CB[8], calculated at the  $\omega$ B97X-D3/cc-pVDZ level in the gas phase using TMS as the chemical shift reference.

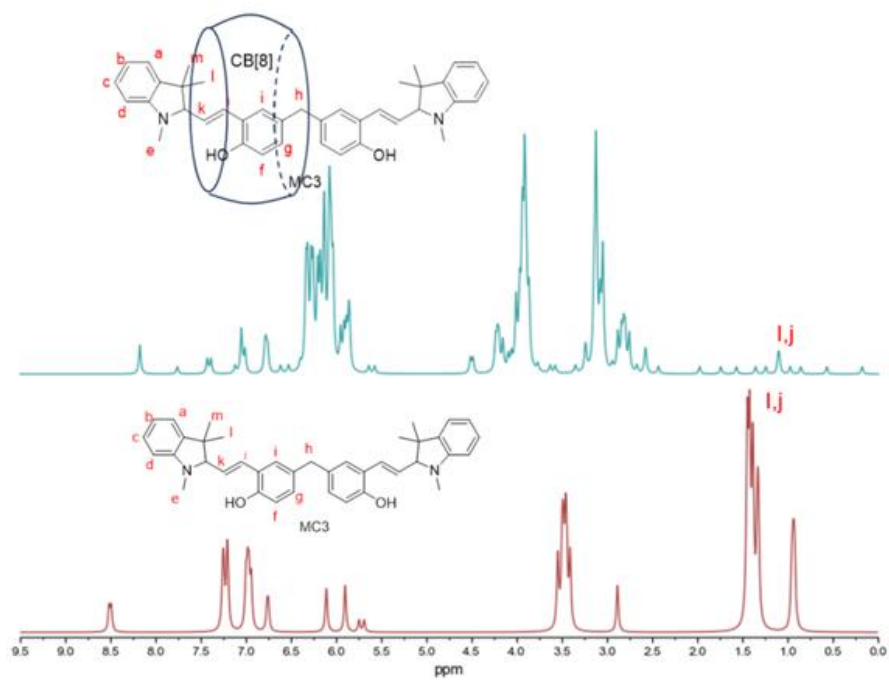

Figure S25. Comparison of simulated NMR spectra of MC3 before and after complexation with CB[8], calculated at the  $\omega$ B97X-D3/cc-pVDZ level in the gas phase using TMS as the chemical shift reference.

## TEA-dependent absorbance decay fitting analysis

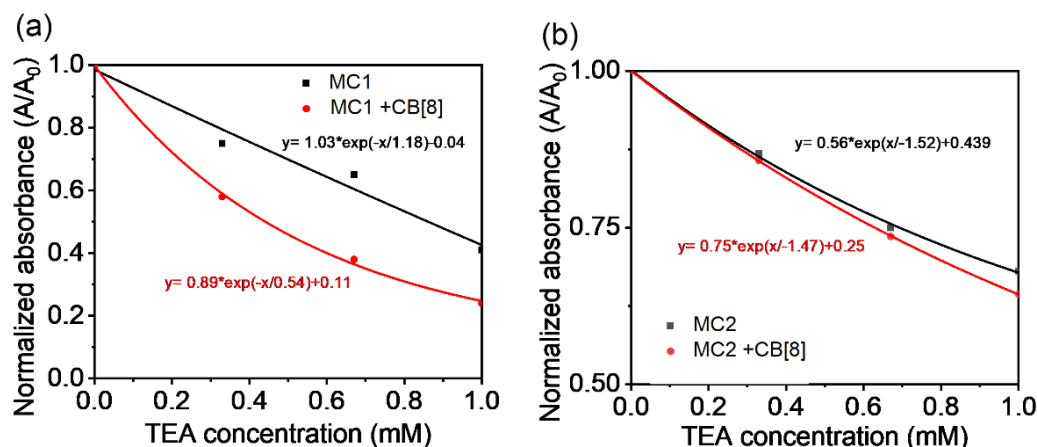

Figure S26. The normalized absorbance at equilibrium (or steady-state) as a function of TEA concentration for different solutions: (a) MC1 and MC1 with CB[8]; (b) MC2 and MC2 with CB[8].

We have reanalyzed our dataset using a pseudo-first-order kinetic model based on the stepwise addition of TEA. The normalized absorbance at equilibrium (or steady-state) as a function of TEA concentration (shown in Fig. S26) can be described by an exponential decay function, which is characteristic of a first-order process influenced by a catalyst (TEA).

The general form of the fitted curve is:

$$A([\text{TEA}]) = A_{\infty} + (A_0 - A_{\infty}) \cdot \exp\left(-\frac{[\text{TEA}]}{K}\right)$$

Where  $A([\text{TEA}])$  is the normalized absorbance at a given TEA concentration,  $A_0$  and  $A_{\infty}$  is the initial and final absorbance. Crucially,  $K$  is inversely related to the rate of the reaction: a smaller  $K$  value indicates a steeper decay and thus a faster reaction. For Fig. S26(a):

MC1 (black line):  $y = 1.03 \cdot \exp(-x/1.18) - 0.04$

The apparent rate constant  $k_{\text{obs}}$ , MC1 =  $1/1.18 \approx 0.85$  (in arbitrary units, since  $x$  is [TEA] in mM).

MC1 + CB[8] (red line):  $y = 0.89 \cdot \exp(-x/0.54) + 0.11$

$k_{\text{obs}}$ , MC1+CB[8] =  $1/0.54 \approx 1.85$ .

The apparent kinetic constant  $K$  of the MC1–CB[8] complex is about 2.19 times smaller than that of free MC1 ( $1.85/0.85 \approx 2.19$ ), meaning the encapsulated guest reacts

approximately twice as fast at any point along the TEA titration. These quantitative findings strongly support a CB[8]-dependent kinetic acceleration.

Fig. S26(b) shows the quenching curves of MC2 with and without CB[8] upon stepwise addition of TEA. For MC2 (black line):  $k_{\text{obs}}(\text{MC2}) = 1/1.52 \approx 0.66$ ; For MC2+CB[8] (red line):  $k_{\text{obs}}(\text{MC2+CB[8]}) = 1/1.47 \approx 0.68$ . Thus, the addition of CB[8] increases the apparent rate constant, indicating a certain degree of acceleration of the MC2 isomerization.

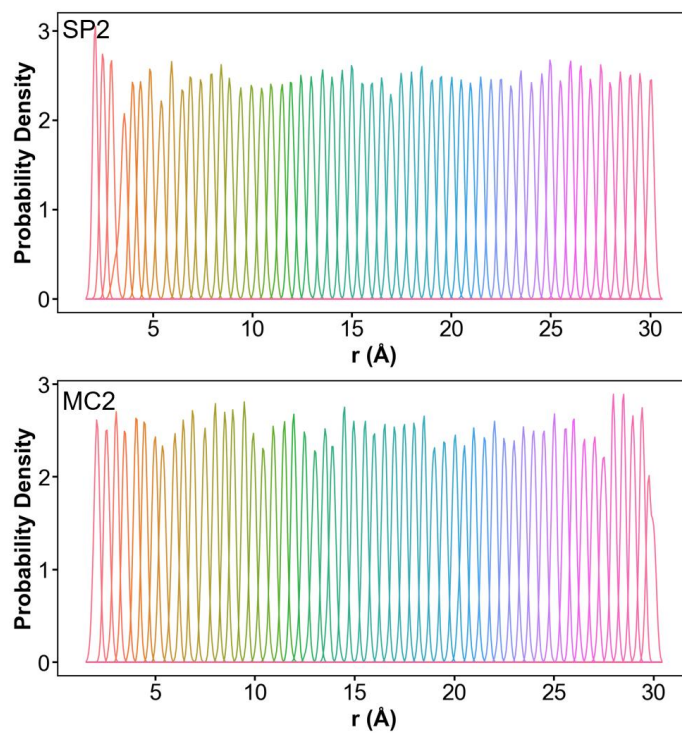

Figure S27. Probability density distributions of US windows for SP2/MC2@ $\gamma$ -CD.
